# Supplementary material
Source: publisher site journal article supplement (https://www.dovepress.com/get_supplementary_file.php?f=301010.docx)
Supplement: Supplementary file 1 [file get_supplementary_file.php]

**Supplementary Table 1: Demographic and RA-related characteristics in analysed and lost to follow-up patients**

|  | Analysed patients  N=207 | Lost to follow-up patients  N=33 | P-value |
| --- | --- | --- | --- |
| Age (years) | 60.4±12.4 | 60.4 ± 14.6 | 0.9865 |
| Female gender | 155 (75.2%) | 22 (66.67%) | 0.30 |
| Living alone | 50 (24.2%) | 5 (15.15%) | 0.25 |
| Full-time occupation | 71 (37.2%) | 15 (46.88%) | 0.62 |
| Part-time occupation | 17 (8.9%) | 2 (6.25%) |
| Disabled/sick leave | 15 (7.9%) | 14 (43.75%) |
| Retired/unemployed | 88 (46.1%) | 1 (3.13%) |
| RA duration (years) | 3.0 [1.0 ; 9.0] | 3.0 [1.0 ; 8.0] | 0.5622 |
| DAS28-CRP | 3.9±0.9 | 4.3 ± 1.1 | 0.0127 |
| At least one extra articular manifestation | 23 (11.22%) | 1 (3.03%) | 0.15 |
| Rhumatoid nodules | 13 (6.28%) | 1 (3.03%) | 0.46 |
| Sjögren’s syndrome | 13 (6.28%) | 1 (3.03%) | 0.46 |
| Erosive arthritis | 73 (36.87%) | 12 (40.00%) | 0.74 |

**Supplementary Table 2. Adherence to MTX – Sensitivity analysis including LOCF imputation of MMAS-8 in patients lost to follow-up (N=240)**

| Sensitivity analysis | M0 | M6 | Change |
| --- | --- | --- | --- |
| MMAS-8 | 6.7 ± 1.8 | 7.1±1.3 | 0.45±1.77  (p=0.0002) |
| Strong adherence | 102 (43.6%)  [37.1% ; 50.2%] | 120 (51.3%)  [44.7% ; 57.9%] | P=0.0523 |
| Strong adherence or improvement by at least one category | 136 (58.1%)  [51.8% ; 64.4%] | |  |

**Supplementary Table 3. Adherence to MTX and DAS28-CRP evolution in patients who switched for RA worsening or need for corticosteroids sparing (N=113) and patients who switched for improving adherence (N=55)**

|  | Patients who switched for RA worsening or need for corticosteroids sparing (N=113) | | | Patients who switched for improving adherence (N=55) | | | |
| --- | --- | --- | --- | --- | --- | --- | --- |
|  | M0 | M6 | Change | M0 | M6 | | Change |
| MMAS-8 | 6.6 ± 1.9 | 7.1 ± 1.3 | 0.55±1.98  (p=0.0036) | 5.5 ± 2.1 | 6.4 ± 1.8 | | 0.90 ± 2.4  (p=0.0075) |
| Strong adherence | 51 (45.1%)  [35.8% ; 54.8%] | 55 (48.7%)  [39.2% ; 58.3%] | P=0.5553 | 10 (18.2%)  [9.1% ; 30.9%] | 21 (38.2%)  [25.4% ; 52.3%] | | P=0.0116 |
| Strong adherence or improvement by at least one category | 67 (59.3%)  [49.7% ; 68.4%] | |  | 28 (50.9%)  [37.1% ; 64.6%] | | |  |
| DAS28-CRP | 4.1 ± 0.9 | 3.2 ± 0.9 | -0.87 ± 0.89  (p<.0001) | 3.86 ± 0.7 | | 3.2 ± 0.7 | -0.66 ± 0.80  (p<.0001) |

**Supplementary Figure 1. Physicians and Patients satisfaction level regarding MTX regimen prescribed after enrolment**

A

B

Legend (A) Physicians- and (B) Patients satisfaction level regarding MTX regimen prescribed after enrolment.
